# Supplementary material for: Regulation of the divalent metal ion transporter via membrane budding
Source: PubMed Central journal article supplement (PMC4914834; doi:10.1038/celldisc.2016.11), 2016-06-21
Supplement: celldisc201611-s3.pdf [file celldisc201611-s3.pdf]

### Supplementary Figure S3

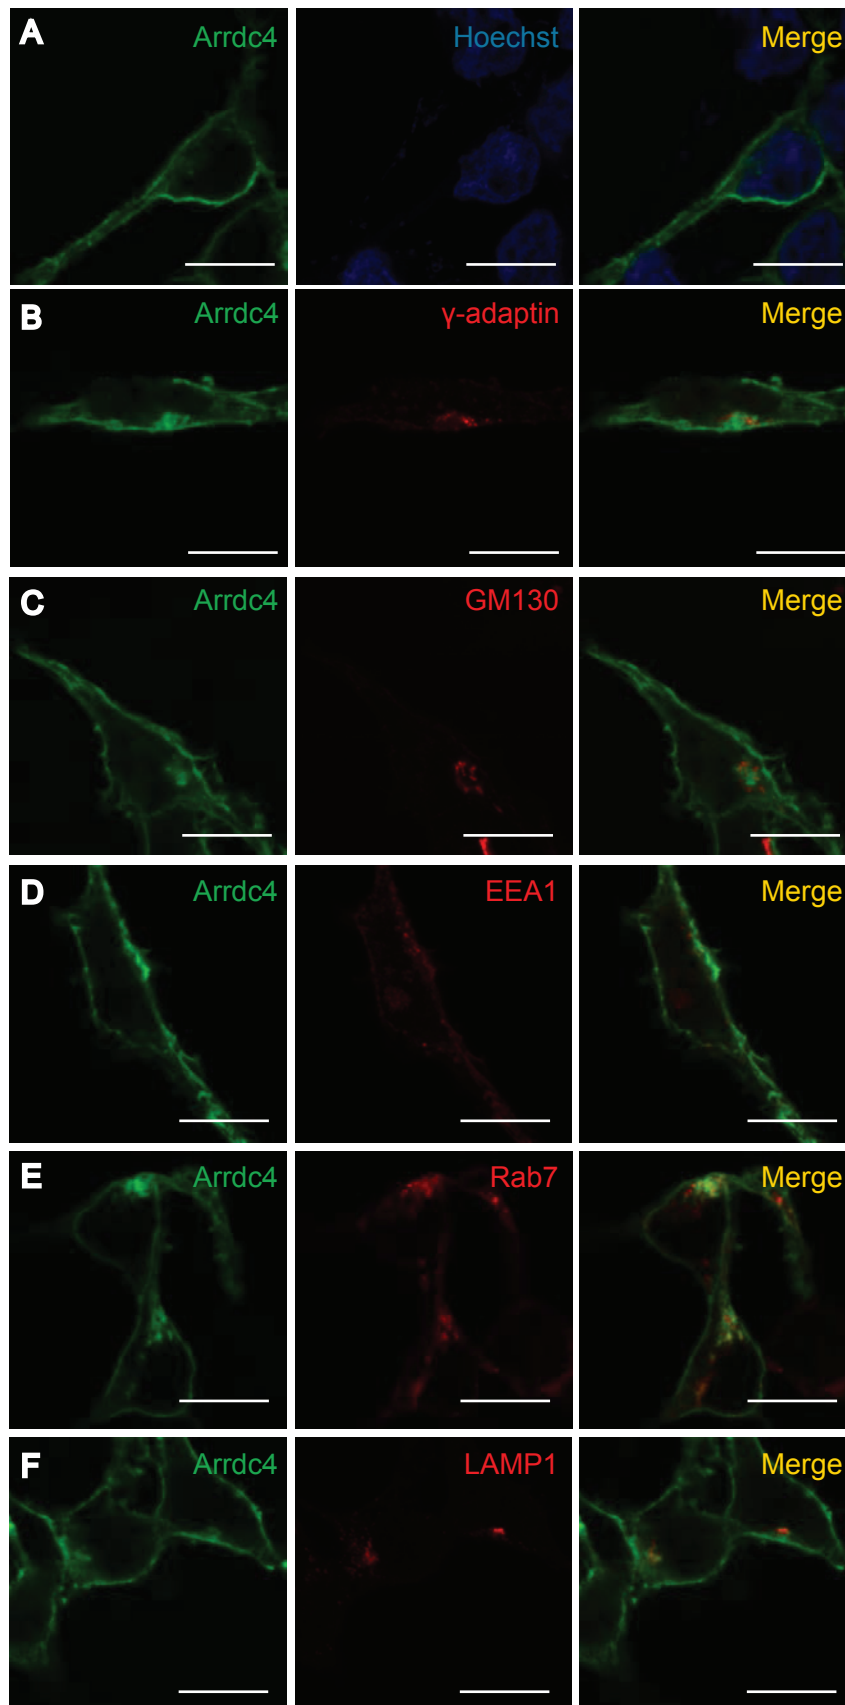

**Supplementary Figure S3. Subcellular localization of Arrdc4.** Confocal microscopy on Arrdc4-GFP transfected HEK293T cells shows that Arrdc4 is highly expressed on the plasma membrane (non-permeabilized; panel A), co-localizes partially with early endosomes (EEA1; panel B), late endosomes (Rab7; panel C), lysosomes (LAMP1; panel D) and recycling endosomes (Rab11; fig 3E). Arrdc4 co-localization with the trans-Golgi network ( $\gamma$ -adaptin; panel E) and Golgi (GM130; panel F) was minimal. Scale bars represent 10  $\mu$ m.
